# Supplementary material for: Cr(vi) permanently binds to the lipid bilayer in an inverted hexagonal phase throughout the reduction process
Source: Royal Society of Chemistry journal article supplement (doi:10.1039/d2ra07851a), 2023-01-01
Supplement: d2ra07851a1.pdf [file d2ra07851a1.pdf]

1 **Cr(VI) permanently binds to lipid bilayer throughout reduction process.**

2

3 Michal Nowakowski <sup>a</sup>, Anna Wiśniewska-Becker <sup>b</sup>, Joanna Czapla-Masztafiak <sup>a</sup>, Jakub  
4 Szlachetko <sup>c</sup>, Andrzej Budziak<sup>d</sup>, Żaneta Polańska <sup>e</sup>, Zuzanna Pietralik-Molińska <sup>e</sup>, Maciej  
5 Kozak <sup>e</sup> and Wojciech M. Kwiatek<sup>a</sup>

6 <sup>a</sup> *Institute of Nuclear Physics Polish Academy of Sciences, PL-31342 Krakow, Poland*

7 <sup>b</sup> *Jagiellonian University in Krakow, Faculty of Biochemistry, Biophysics and Biotechnology, PL-30387, Krakow, Poland*

8 <sup>c</sup> *Solaris National Synchrotron Radiation Centre, Jagiellonian University, 30-392 Krakow, Poland*

9 <sup>d</sup> *AGH University of Science and Technology, Faculty of Energy and Fuels, Krakow, Poland*

10 <sup>e</sup> *Adam Mickiewicz University in Poznan, Faculty of Physics, PL-61-614, Poznan, Poland*

11

12 *\*wojciech.kwiatek@ifj.edu.pl*

13

14 **Supplementary Information**

15

16

17

18 **1. Liposome evaluation**

19 **1) Liposomal phase transition temperature determination**

20 Measurements were carried out on the Fourier Transfer Infrared (FTIR) Bruker  
21 TENSOR 27 Spectrometer with the ATR Platinum attachment and temperature controller  
22 HAAKE DL 30. The spectrometer was equipped with a KBr beamsplitter and DLATGS  
23 detector. The measurements were performed in a spectral range of 3000-2800-  $\text{cm}^{-1}$  with a  
24 spectral resolution of 4  $\text{cm}^{-1}$  and a temperature range from 2 °C to 40 °C. The data were analyzed  
25 using OPUS data processing software (Bruker Optics). The positions of characteristic bands

26 were obtained from the second derivative spectra. Liposomal phase transition temperatures  
27 were determined using Infrared spectroscopy based on the position of  $\nu_s(\text{CH}_2)$  band.

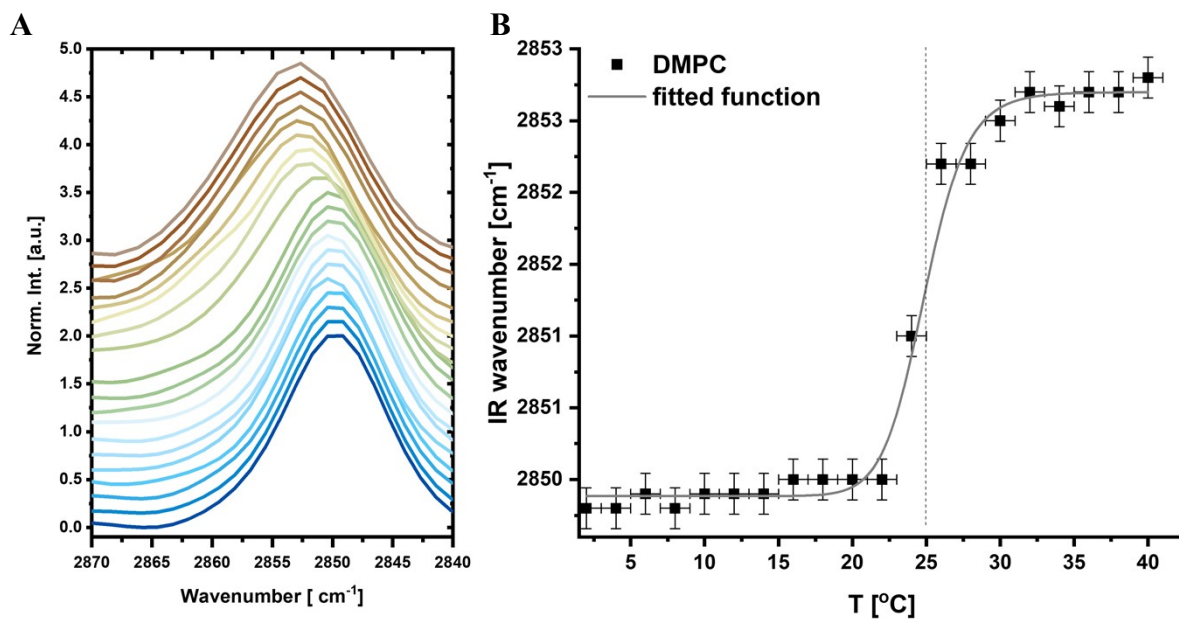

**Fig. S1.1.** Results of IR experiment for DMPC liposomes **A** – IR spectra stack-plotted as a function of temperature; **B** - the position of the  $\nu_s(\text{CH}_2)$  band as a function of temperature. Vertical dashed line indicates an inflection point and a  $T_m$ .

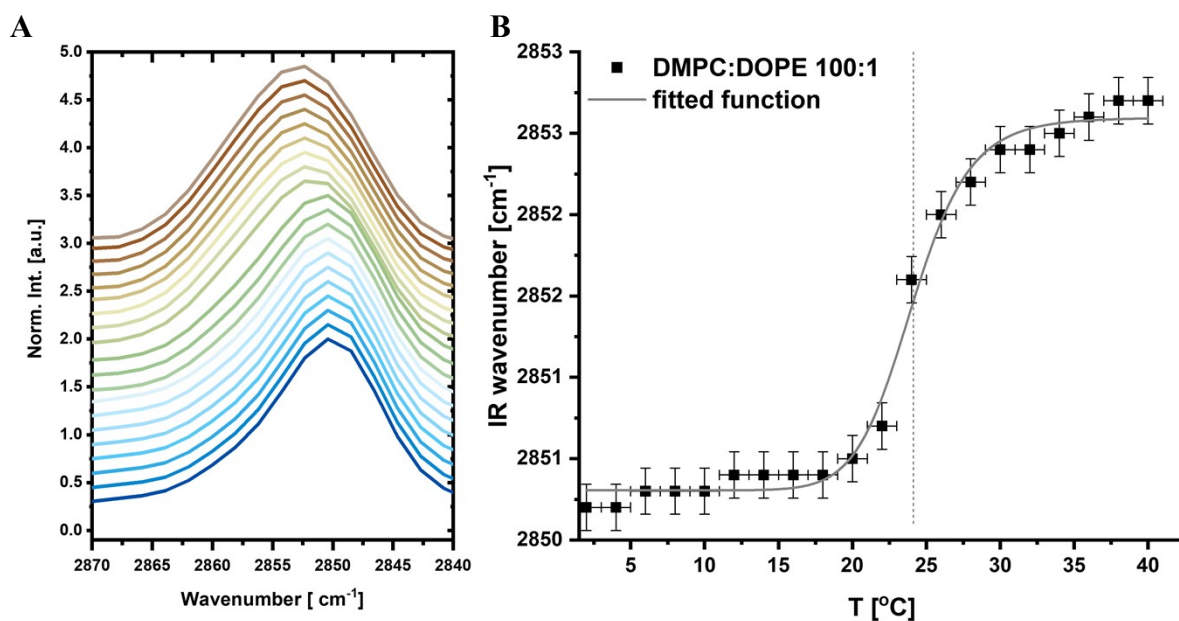

**Fig. S1.2.** Results of IR experiment for DMPC:DOPE 100:1 liposomes **A** – IR spectra stack-plotted as a function of temperature; **B** - the position of the  $\nu_s(\text{CH}_2)$  band as a function of temperature. Vertical dashed line indicates an inflection point and a  $T_m$ .

28

29

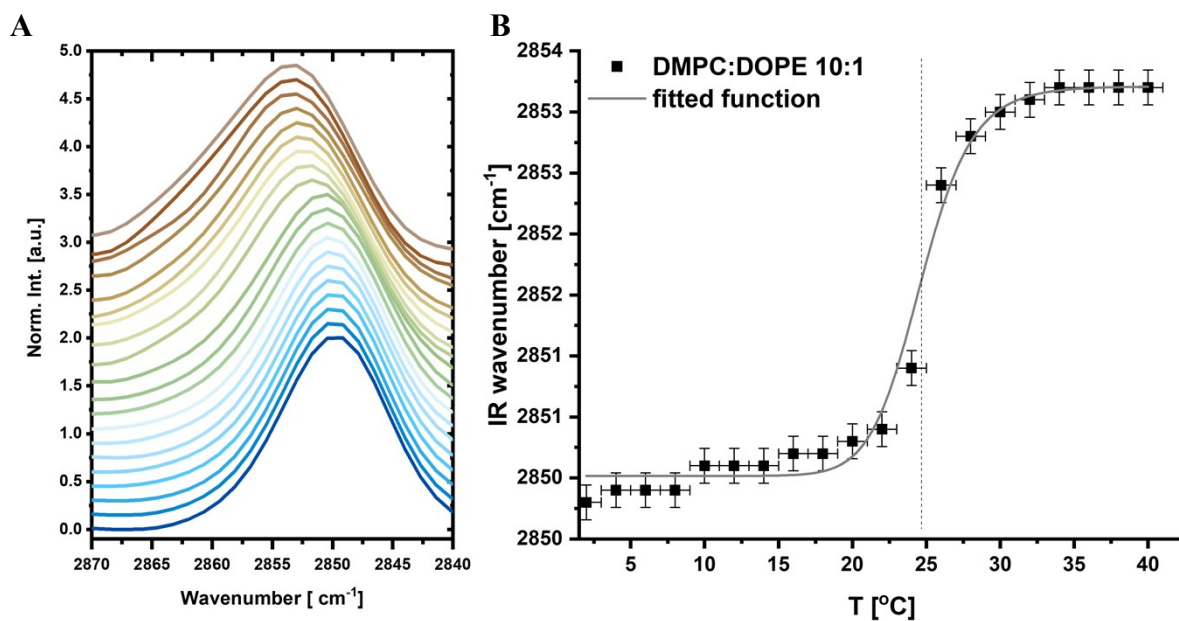

**Fig. S1.3.** Results of IR experiment for DMPC:DOPE 10:1 liposomes **A** – IR spectra stack-plotted as a function of temperature; **B** - the position of the  $\nu_s(\text{CH}_2)$  band as a function of temperature. Vertical dashed line indicates an inflection point and a  $T_m$ .

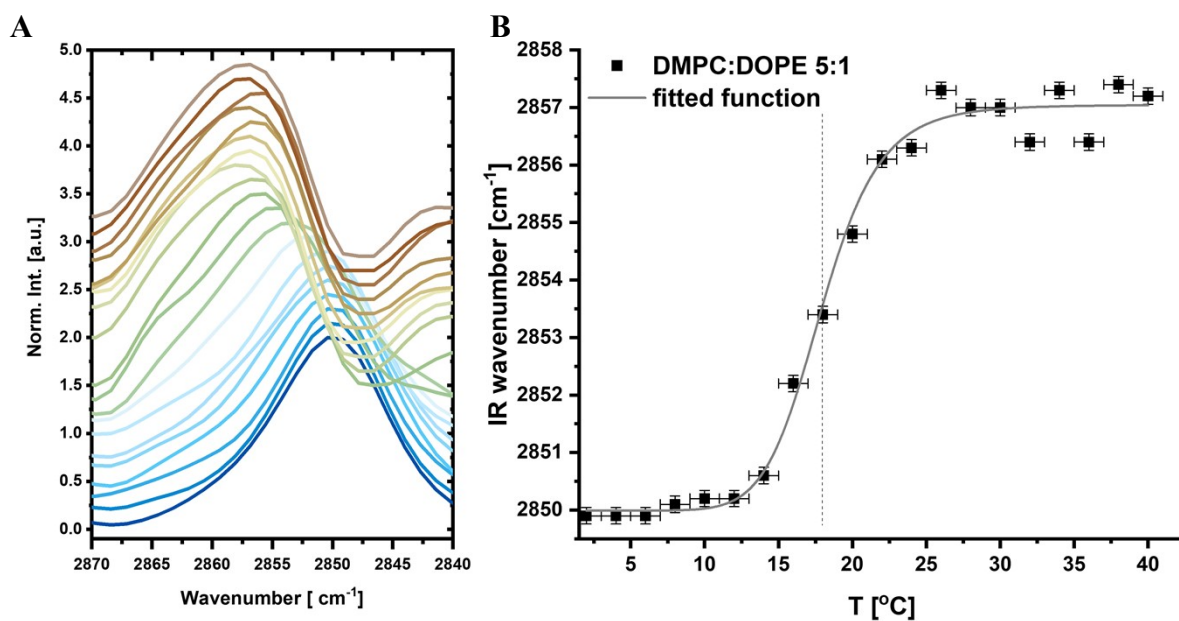

**Fig. S1.4.** Results of IR experiment for DMPC:DOPE 5:1 liposomes **A** – IR spectra stack-plotted as a function of temperature; **B** - the position of the  $\nu_s(\text{CH}_2)$  band as a function of temperature. Vertical dashed line indicates an inflection point and a  $T_m$ .

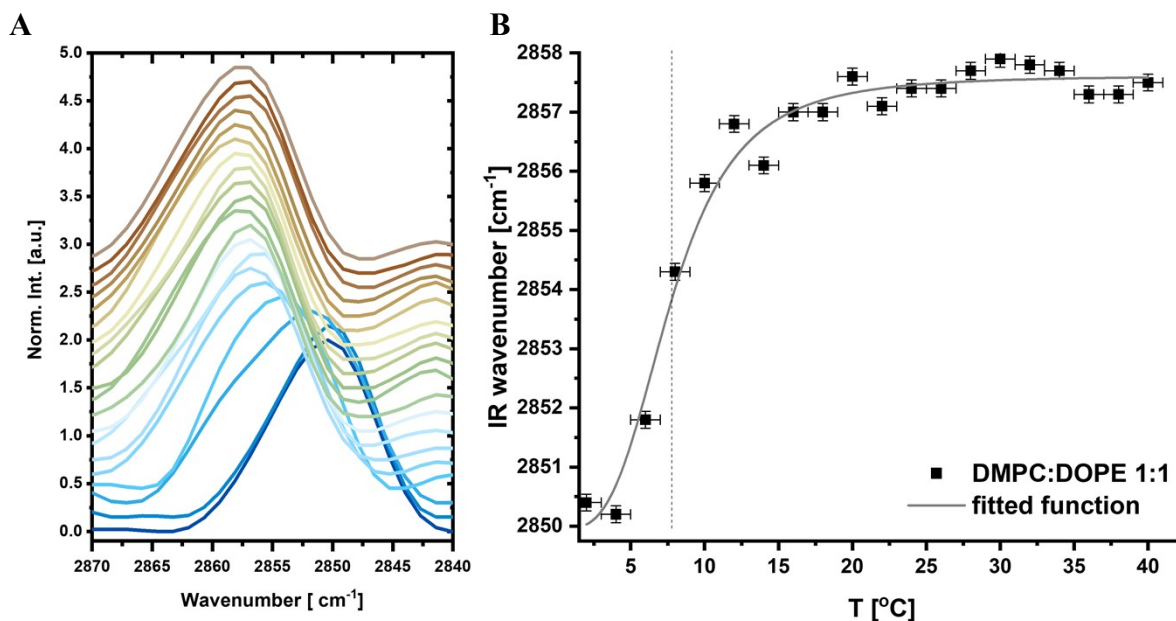

**Fig. S1.5.** Results of IR experiment for DMPC:DOPE 1:1 liposomes **A** – IR spectra stack-plotted as a function of temperature; **B** - the position of the  $\nu_s(\text{CH}_2)$  band as a function of temperature. Vertical dashed line indicates an inflection point and a  $T_m$ .

31

32 The collected FTIR spectra for DMPC are presented in Fig. S1.1A and spectra for  
 33 liposomes with increasing DOPE content are presented in Fig. S1.2-1.5A. A fitting procedure  
 34 determined the position of the  $\nu_s(\text{CH}_2)$  band for each spectrum and the results were plotted as a  
 35 band position as a function of temperature (Fig. S 1.1-1.5 B). As can be observed,  $\nu_s(\text{CH}_2)$  bands  
 36 are shifting toward higher wavenumbers as temperature increases. It is connected to the phase  
 37 transition from the lamellar gel phase to the liquid crystal phase, where *trans-gauche*  
 38 isomerization of aliphatic chains occurs<sup>1</sup>. A sigmoidal function shape was fitted to obtain the  
 39 inflection point of the sigmoid curve, which indicated the  $T_c$ . One can see that the addition of  
 40 DOPE is causing the decrease in the  $T_c$  value, which is the highest for pure DMPC liposomes.  
 41 The presence of unsaturated acyl chains in DOPE molecules increases the membrane fluidity  
 42 which causes the decrease of  $T_c$ . This behavior was already predicted for numerous liposomal  
 43 mixtures<sup>2</sup>.

44

45 **Table S1.1** Phase transition temperatures determined by FTIR. The values in brackets  
46 indicate total uncertainty.

| <b>Liposomes</b> | <b>Phase transition temperature <math>T_c</math> [°C]</b> |
|------------------|-----------------------------------------------------------|
| DMPC             | 24.9(4)                                                   |
| DMPC:DOPE 100:1  | 24.1(3)                                                   |
| DMPC:DOPE 10:1   | 24.7(4)                                                   |
| DMPC:DOPE 5:1    | 17.9(9)                                                   |
| DMPC:DOPE 1:1    | 7.7(1.3)                                                  |

47

## 48 **2) Phase transition enthalpy**

49 Differential scanning calorimetry was used to determine the enthalpy of the relevant  
50 phase transitions as shown in Fig. S1.6. The transition enthalpies are shown in Table S1.2.  
51 Measurements were performed on a DSC-204 calorimeter, (Netzsch GmbH, Germany).  
52 Samples of 20  $\mu$ l were closed in aluminum crucibles. Measurements were performed at the  
53 heating rate of 1 °C/min, in helium atmosphere (He flow rate: 40 mL/min). For each sample,  
54 two independent measurements were performed and the results were averaged. The data were  
55 analyzed using the TA Netzsch program. For the determination of enthalpy values  
56 characterizing phase transitions, a linear or a tangent-sigmoidal baseline was used.

57 Recorded DSC thermograms are presented in Fig S1.6 and determined parameters are  
58 summarized in Tab. S1.2. Thermogram for DMPC-based liposomes exhibits two phase  
59 transitions, the main transition and pretransition characterized by temperatures of 24.1 and 16.5  
60 °C, respectively. These values are in good agreement with the literature<sup>3</sup>. The addition of DOPE  
61 causes the disappearance of the pretransition, a slight shift of the beginning of the main  
62 transition toward lower values, and a significant decline in the transition enthalpies values,  
63 which led to evanesce of the peak in the thermogram recorded for the system with the highest  
64 DOPE content. These changes indicate a decrease in the degree of cooperative of the transition

65 caused by the weakening of interactions between aliphatic chains due to the incorporation of  
 66 the lipid molecules with unsaturated fatty acids between DMPC molecules <sup>4</sup>[].

67

|                    | $T_m$ [°C] | $T_{onset}$ [°C] | $\Delta T_{1/2}$ [°C] | $\Delta H$ [kJ/mol] |
|--------------------|------------|------------------|-----------------------|---------------------|
| DMPC*              | 24.1       | 23.9             | 0.3                   | 15.6                |
| DMPC:DOPE<br>100:1 | 23.9       | 23.8             | 0.2                   | 11.1                |
| DMPC:DOPE 10:1     | 23.8       | 23.6             | 0.2                   | 5.0                 |
| DMPC:DOPE 5:1      | 23.9       | 23.7             | 0.2                   | 3.2                 |
| DMPC:DOPE 1:1      | x          | x                | x                     | X                   |

68 **Table S1.2.** Transition temperatures and enthalpies obtained for the studied liposomes.

69 \*DMPC pretransition:  $T_p = 16.5^\circ\text{C}$ ,  $T_{onset} = 15.6^\circ\text{C}$ ,  $\Delta T_{1/2} = 0.9^\circ\text{C}$ ,  $\Delta H = 1.7$  kJ/mol

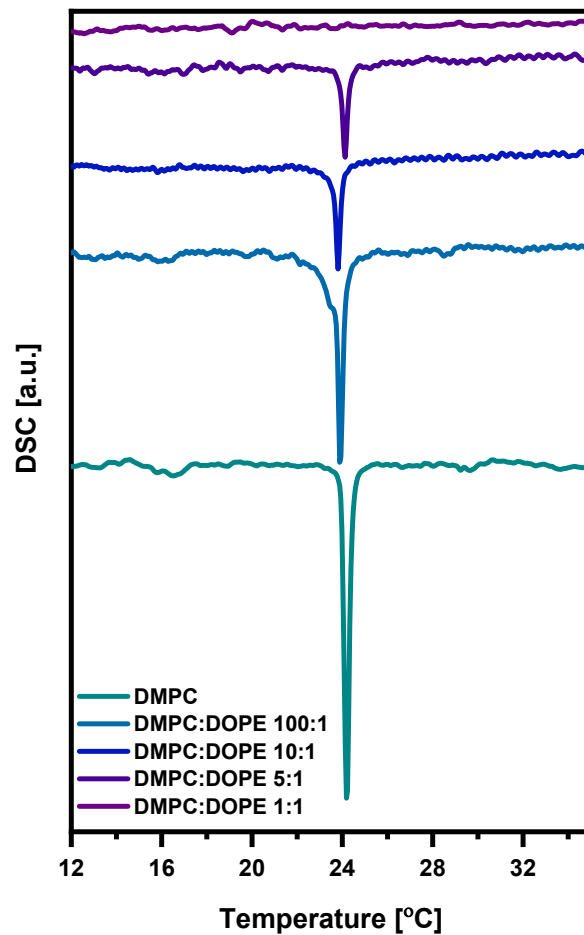

**Fig. S1.6.** Results of DSC measurements for liposomes based on DMPC with the increasing DOPE content.

70

71 **3) Liposomal morphology study**

72 For further evaluation of liposome morphology small angle X-Ray scattering  
 73 measurements were performed at two temperatures: 15 °C and 30 °C, that is, below and above  
 74 the detected phase transition temperature. Small angle X-ray scattering measurements were  
 75 conducted using a XEUSS 2.0 system (XENOCES, France), equipped with MetalJet microfocus  
 76 X-ray source ( $\lambda = 0.134$  nm) with a liquid metal target (gallium/indium alloy) (Excillum AB,  
 77 Sweden), PILATUS 3 R 1 M hybrid photon counting 2D detector (Dectris AG, Switzerland)  
 78 and Fox 3D Ga ultra-low divergence mirrors (XENOCES, France). The sample-to-detector

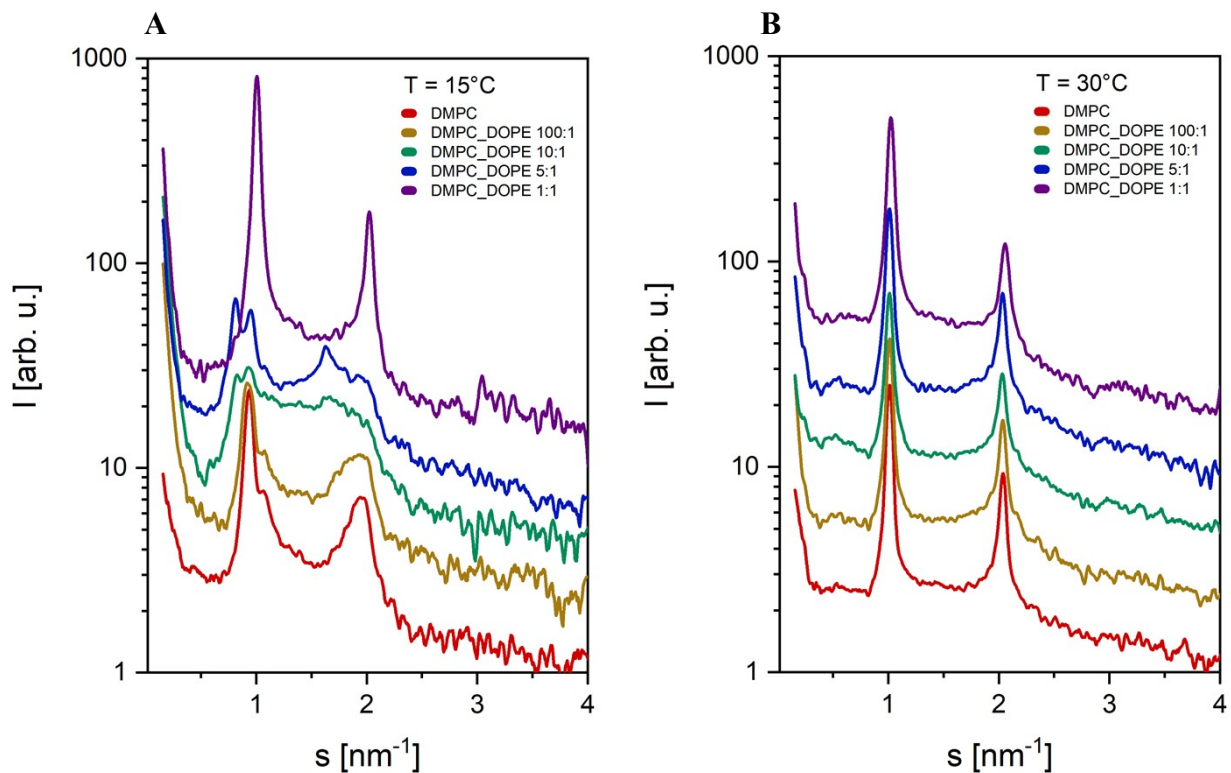

**Fig. S1.7.** Results of SAXS experiment for all studied liposomes **A** – Below  $T_c$  (15°C); **B** – Above  $T_c$  (30°C)

79 distance was 1686 mm and Linkam temperature attachment (Linkam Scientific Instruments  
 80 Ltd., UK) and borosilicate glass capillaries (Hilgenberg GmbH, Germany) were used. For each  
 81 sample, 12 frames (600 s/frame) were collected. Then all the collected frames were processed  
 82 using FOXTROT processing software <sup>5</sup> and the buffer scattering was subtracted using  
 83 PRIMUS <sup>6</sup>.



84

85 The results of SAXS experiments for systems with DMPC and DMPC:DOPE are shown in Fig  
86 S1.7. For temperature above  $T_c$  SAXS curves recorded for studied systems exhibit a lamellar  
87 structure characteristic for phospholipids with diffraction peaks appearing in relation to each  
88 other in a 1:2. For DMPC liposomes at a temperature above  $T_c$ , the intramolecular distances are  
89  $d_{001} = 6.20$  nm and  $d_{002} = 3.09$  nm. These values remain unchanged upon the DOPE addition,  
90 only for the highest content of DOPE (1:1) a slight decrease is observed ( $d_{001} = 6.13$  nm and  
91  $d_{002} = 3.05$  nm). Also, the intensity of the diffraction peaks is dependent on DOPE concentration  
92 which implies that the second lipid component has a destabilizing effect on the formed bilayer  
93 structures.

94 At temperature below  $T_c$  additional diffraction reflections are observed. This is clearly visible  
95 in SAXS curve record for the sample with 5:1 ratio of DMPC:DOPC. These peaks can be either  
96 attributed to two-phase separated lamellar structure with for different lipid composition and  
97 corresponding lattice parameters of 7.72 nm and 6.61 nm. However there is also possibility that  
98 the lamellar structure coexists with hexagonal phase characterised by intramolecular distances  
99  $d_{100} = 6.6$  nm,  $d_{110} = 3.79$  nm,  $d_{200} = 3.29$  nm (the ratio of  $1:\sqrt{3}:2$ ) and the calculated  
100 intercolumnar distance for this phase would be 7.64 nm. For the highest DOPE content, single  
101 lamellar structure is formed with  $d_{001} = 6.24$  nm,  $d_{002} = 3.14$  nm and  $d_{003} = 2.07$

### 103 XRD experiment

104 Fig. S2 presents XRD patterns of Cr(VI)-untreated samples. One can see that there is a  
105 significant difference between DMPC and DMPC:DOPE liposomes even for the lowest DOPE  
106 content in terms of internal ordering. Table S1 presents detailed information regarding the most  
107 important and common for all spectra features of the XRD patterns discussed in the main text.  
108 Table S2 contains additional peaks identified in the XRD patterns in Fig S2. As indicated in the  
109 main text, in both groups, when Cr(VI) was added, an internal order of phospholipid bilayers  
110 has decreased except for the DMPC:DOPE 1:1 sample.

111 An average thickness of liposomal membranes with a large DOPE fraction (Fig. 1 b)  
112 decreased when samples were treated with a Cr(VI), while for liposomes with a small DOPE  
113 fraction, the effect was more subtle and opposite. For DMPC and DMPC:DOPE 100:1, very  
114 weak structures are present at a high angle limit of  $2\theta$ . While for DMPC, there is one peak with  
115 a maximum of  $2\theta$  at  $28.18^\circ$  (equal to  $3.16 \text{ \AA}$ ), for DMPC:DOPE 100:1, there are two maxima

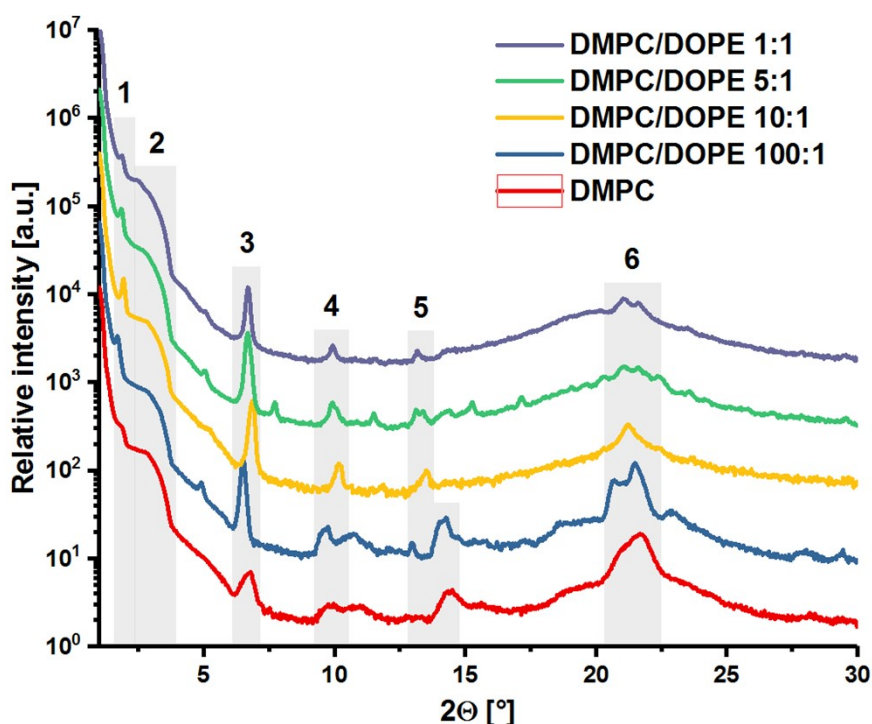

Fig. S2. X-Ray powder patterns of liposomal samples that were not treated by Cr(VI). Numbers are corresponding to peaks in Table 1, and grey areas indicate regions of interest.

116 at the  $28.05^\circ$  and  $29.44^\circ$  of  $2\theta$  (equal to the 3.18 and 3.03 Å respectively). These features are

117 missing in the group with a high DOPE ratio (Fig. 1 b). For Cr(VI)-treated samples with a low  
 118 DOPE fraction (Fig. 1 a), mentioned peaks are not visible. In turn, both samples exhibit two  
 119 twin-like peaks that emerged with maxima at the 27.24 ° and 27.60 ° of 2 $\theta$  (equal to the 3.27  
 120 and 3.23 Å respectively) for DMPC +Cr liposomes and 27.14 ° and the 27.48 ° of 2 $\theta$  (equal to  
 121 the 3.28 and 3.24 Å correspondingly) for the DMPC:DOPE 100:1 +Cr liposomes. The DMPC  
 122 and DMPC:DOPE 100:1 liposomes had the least fluid membranes, and a Cr(VI) had little  
 123 ability to penetrate lipid membranes compared to a high DOPE ratio group. The experiment  
 124 was prepared so that Cr(VI) permeated throughout lipid membranes thanks to a force generated  
 125 due to an imbalance of Cr(VI) concentration between the inside and outside of a liposome. We  
 126 speculate that the permeation process started from an external surface of liposomes, yet the  
 127 process was slowed down if the membrane was not fluid enough. Moreover, there was not  
 128 enough target for oxidation (–HC=CH–) and the creation of a new ordered structure with a  
 129 defined  $d_{hkl}$  value related to the oxidation product. Therefore, it is reasonable to associate the  
 130 double peak in the DMPC +Cr and DMPC:DOPE 100:1 +Cr XRD patterns with a reaction

|                 | 6                            | 5     | 4     | 3     | 2 <sup>b</sup> | 2 <sup>a</sup> | 1     |
|-----------------|------------------------------|-------|-------|-------|----------------|----------------|-------|
|                 | Peak position 2 $\theta$ [°] |       |       |       |                |                |       |
| DMPC            | 21,69                        | 14,44 | 9,86  | 6,68  | 3,71           | 2,81           | 1,88  |
| DMPC/DOPE 100:1 | 21,49                        | 14,27 | 9,76  | 6,52  | 3,71           | 2,88           | 1,71  |
| DMPC/DOPE 10:1  | 21,23                        | 13,51 | 10,16 | 6,85  | 3,71           | 2,84           | 1,94  |
| DMPC/DOPE 5:1   | 21,13                        | 13,37 | 9,93  | 6,69  | 3,71           | 2,88           | 1,81  |
| DMPC/DOPE 1:1   | 21,06                        | 13,14 | 9,93  | 6,69  | 3,75           | 2,91           | 1,88  |
|                 | Peak position [Å]            |       |       |       |                |                |       |
| DMPC            | 4,09                         | 6,13  | 8,96  | 13,22 | 23,77          | 31,39          | 47,06 |
| DMPC/DOPE 100:1 | 4,13                         | 6,20  | 9,05  | 13,54 | 23,77          | 30,67          | 51,66 |
| DMPC/DOPE 10:1  | 4,18                         | 6,55  | 8,69  | 12,88 | 23,77          | 31,03          | 45,44 |
| DMPC/DOPE 5:1   | 4,20                         | 6,61  | 8,90  | 13,20 | 23,77          | 30,67          | 48,70 |
| DMPC/DOPE 1:1   | 4,21                         | 6,73  | 8,90  | 13,20 | 23,56          | 30,31          | 47,06 |

a - beginning of a "bump"

b - end of a "bump"

**Table S2** Main characteristic peak positions for all samples from Fig. S2. The table is divided to two groups with low and high DOPE fraction. Upper part of table shows results of 2 $\theta$  value in [°], while bottom part shows corresponding  $d_{hkl}$  values in [Å]. Positions of a characteristic “bump” shown in Fig. 1 is indicated by green background.

131 between Cr(VI) and the surface of membranes which, in turn, could increase the order on these  
132 surfaces.

133 The position of all main peaks marked in Fig S2 correlate with distinct parts of a bilayer:  
134 surface,  $-\text{HC}=\text{CH}-$  bond position, an interface between monolayers, and finally, the total  
135 bilayer thickness. For example, in the case of the DMPC:DOPE 1:1 sample main peaks in Table  
136 S1 are corresponding to the following distances: 4.2 Å, 6.7 Å, 8.9 Å, 13.2 Å, 23.6 Å, 30.3 Å,  
137 and 47.1 Å. Values of 8.9 Å and 13.2 Å correspond to a  $-\text{C}=\text{C}-$  bond position, while the value  
138 of 47.1 Å is comparable to a 2-fold value of a single monolayer thickness. Additionally,  
139 distances of 23.6 Å and 30.3 Å are comparable to a single monolayer thickness. It must be noted  
140 that there are similar relations between different reflections:  $8.9/4.2 \approx 2.1$ ,  $13.2/6.7 \approx 2.0$ ,  
141  $47.1/23.6 \approx 2.0$ . These distances could be interpreted either as bilayer and monolayer  
142 characteristic  $d_{hkl}$  values or just the next-order X-Ray reflections (yet it does not change the  
143 general interpretation of the presented results). However, since peak shifts are not the same, we  
144 interpret these peaks as actual first-order XRD reflections. Finally, when Cr(VI) was added,  
145 the most pronounced changes were visible in a range of c.a. 47-40 Å, the “bump” and peak  
146 around the 6.6 Å, associated with a shape of whole bilayers.

147 The liposomes with the highest DOPE concentration exhibited different properties than  
148 other samples when treated with a Cr(VI). For the DMPC:DOPE 1:1 +Cr, an additional peak at  
149  $2.48^\circ$  (35.58 Å) appeared (Fig. 1 B). Additionally, the most intense peak in the DMPC:DOPE  
150 1:1 +Cr spectrum is split into two components with intensity maxima at  $7.69^\circ$ ,  $6.69^\circ$  (11.48 Å  
151 and 13.20 Å). A broad peak at  $21.06^\circ$  (4.21 Å) is singular for Cr(VI)-treated spectrum and was  
152 split for the DMPC:DOPE 1:1 pattern. While the broad feature cannot be precisely interpreted,  
153 splits around  $7$  and  $2^\circ$  could be associated with creating two co-existing phases of  
154 phospholipids, each of them created domains. Interestingly, all liposomes, regardless of DOPE

155 concentrations, had similar XRD patterns after a Cr(VI) treatment, except the region between  
156 3.7 and 2.8 ° where the averaged structure is present.

157

158

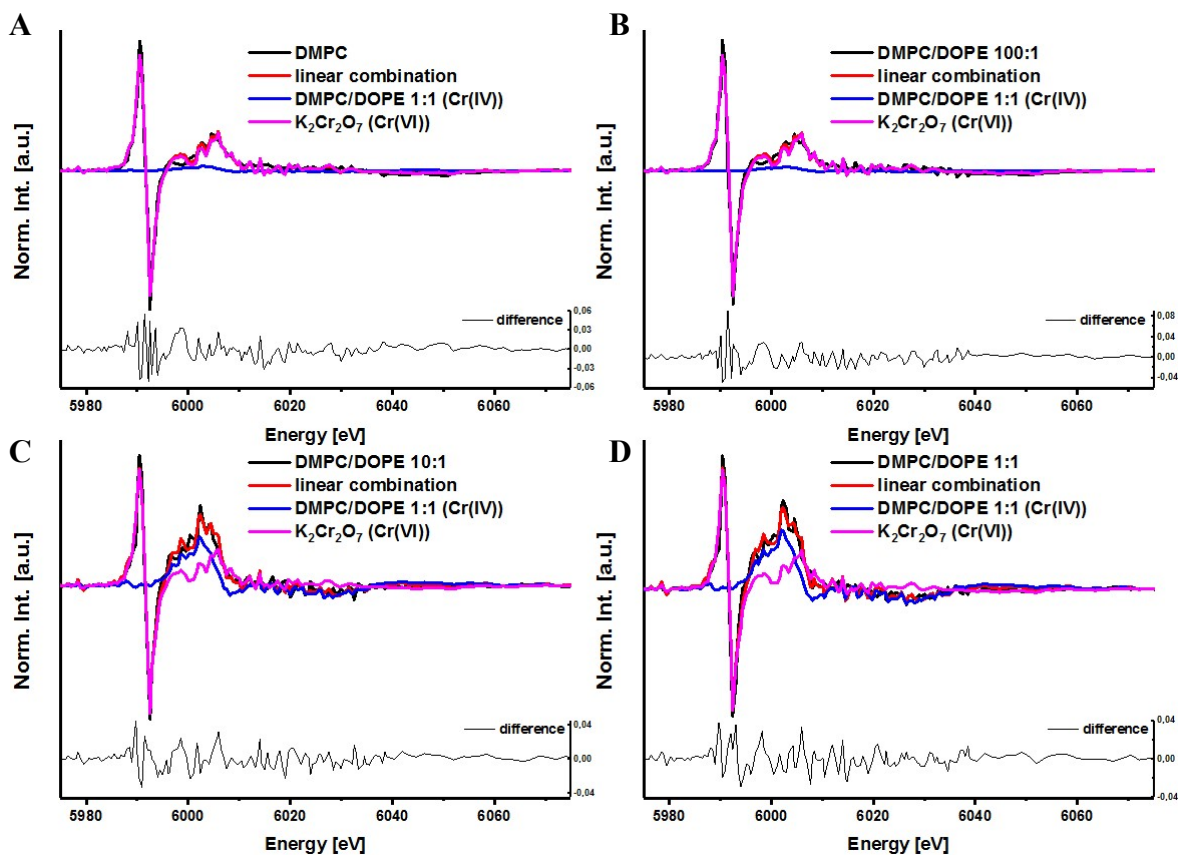

**Fig. S3.** Fitting results for liposomal samples. Since LCF was done on differentiated spectra, for purpose of presentation, energy ranges in this figures were cut only to important parts. LCF results for : A – DMPC liposomes; B – DMPC:DOPE 100:1 liposomes; C – DMPC:DOPE 5:1 liposomes; D – DMPC:DOPE 1:1 liposomes.

160

161 The experimental protocol for a pellet preparation contained a drying step at 55 °C. This step  
 162 has extended an effective reaction process between the  $K_2Cr_2O_7$  and liposomes from 15 minutes  
 163 to approx. 12 h. Moreover, when water was removed, a local concentration of all reagents  
 164 increased, thus shifting the reaction equilibrium:  $Cr(VI) + R \leftrightarrow Cr(III)-R$  into the product side.  
 165 In general, it could lead to the production of new products. To rule out this possibility, we have  
 166 performed quick XANES scans of liquid liposomal samples. Samples had the same composition  
 167 as liposomes in pellets, yet the reaction time was precisely 15 minutes before the dialysis  
 168 procedure stopped. We have compared outcome XANES spectra for pellets and suspension by

169 calculating differential spectra:  $XAS^{lip} - XAS^{K2Cr2O7}$  (Fig. S3). No additional types of  
170 compounds were created during sample drying, which agrees with some literature reports about  
171 Cr(VI) interaction with lipid bilayers studied using EPR spectroscopy <sup>7</sup>.



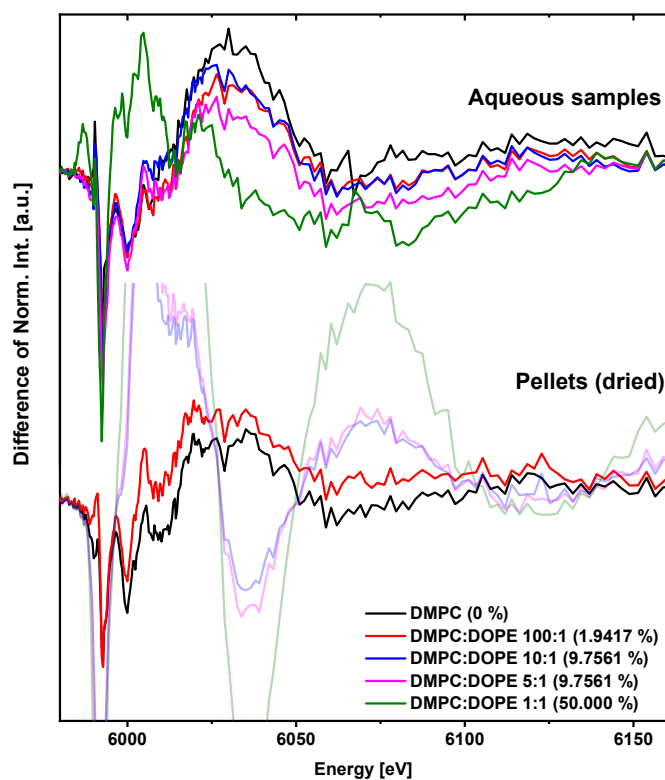

**Fig. S4.** Differential spectra calculated for both liposomal suspension and pellets as: sample –  $K_2Cr_2O_7$ . Spectra were normalized and smoothed in Athena software, using Gaussian filter with kernel size of 3 and width 10, prior to difference spectra calculation.

173 In the range of 5970-6055 eV for the aqueous DMPC, DMPC:DOPE 100:1, DMPC:DOPE

| Sample          | Cr reference                                           |                        | [Cr(VI)/Cr(IV)] | R     |
|-----------------|--------------------------------------------------------|------------------------|-----------------|-------|
|                 | K <sub>2</sub> Cr <sub>2</sub> O <sub>7</sub> (Cr(VI)) | DMPC:DOPE 1:1 (Cr(IV)) |                 |       |
| DMPC            | 0.899(19)                                              | 0.101(19)              | 8.901(1.863)    | 0.072 |
| DMPC:DOPE 100:1 | 0.959(20)                                              | 0.041(20)              | 23.390(11.898)  | 0.075 |
| DMPC:DOPE 10:1  | 0.969(21)                                              | 0.031(21)              | 31.258(21.852)  | 0.075 |
| DMPC:DOPE 5:1   | 0.910(21)                                              | 0.090(21)              | 10.111(47)      | 0.094 |
| DMPC:DOPE 1:1   | 0.786(25)                                              | 0.214(25)              | 3.673(546)      | 0.163 |

**Table S3.** LCF results for liquid samples. As previously, K<sub>2</sub>Cr<sub>2</sub>O<sub>7</sub> and DMPC:DOPE 1:1 samples were used as references for Cr(VI) and Cr(IV) respectively. The R value is fit evaluation and is defined as

$$R = \sum_i^N \frac{y_i - y_i'}{y_i^2}$$

174 10:1, and DMPC:DOPE 5:1 changes are similar to these observed for the DMPC and  
 175 DPMC/DOPE 100:1 for pellets. The main difference is due to the magnitude of changes  
 176 observed. The aqueous DMPC:DOPE 1:1 sample has more Cr(VI) fraction of its counterpart  
 177 from the pellet, which can also be seen in Table S3, and the presence of a feature around 6065  
 178 eV in Fig. S4. Values in Table S3 were obtained in the same LCF procedure as applied for the  
 179 data in Table 1. Compared to results obtained from LFC presented in Table S3, there was much  
 180 less reduction process in liquid samples. Due to the lower density of Cr in aqueous samples in  
 181 general, there was a much worse S/N ratio, and subsequently, R values are worse, especially  
 182 for the DMPC:DOPE 1:1 liposomes.

183

184

## 185 XRF experiment details

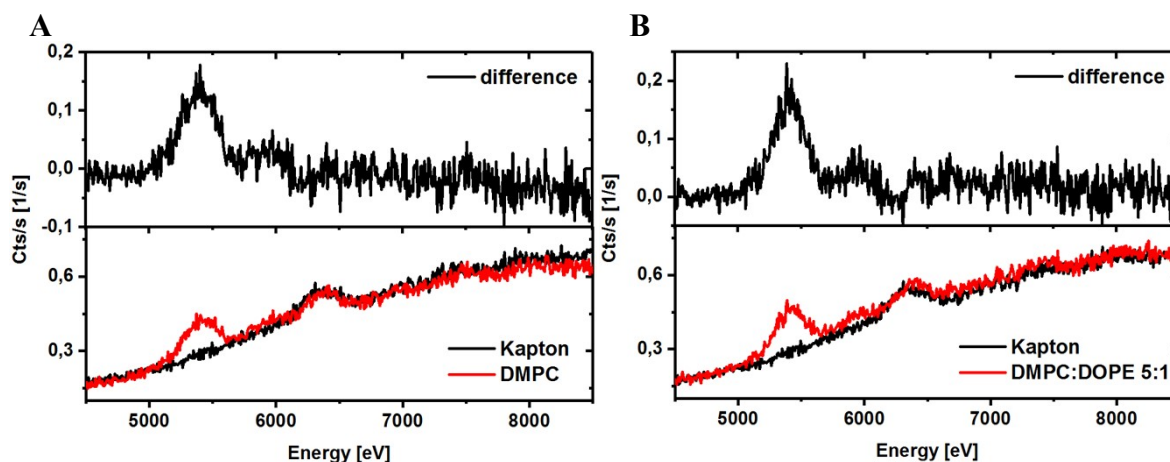

Fig. S5. Differential XRF spectra (top) for exemplary data from Fig. 4 obtained by subtracting the background spectrum liposomal one (bottom) for: A – DMPC +Cr liposomes; B – DMPC:DOPE 5:1 + Cr liposomes.

186

187 In the XRD experiment, the energy scale was spanned from 3.5 keV to 8.4 keV. The  
188 detection window was as such since for the energy lower than 1642 eV our setup would not  
189 resolve any characteristic fluorescence, and no interesting signal was expected. Additionally, a  
190 background contribution was very high in the 0 – 1500 eV region. We have used a 30 kV  
191 voltage with  $\sim 20 \mu\text{A}$  lamp current. An additional collimating Pb tube suppressed strong Fe, Cu,  
192 and Ni peaks originating from the experimental setup (background, Fig. 4). From all liposomal  
193 and reference spectra, the background spectrum (a Kapton foil) was subtracted, and all residual  
194 peaks originated from the local environment were removed as well as a baseline was improved  
195 (examples: Fig. S5 a-b). A Gaussian peak function was fitted to Cr  $K\alpha$  emission lines using  
196 OriginPro 9.1 Sr2 (*OriginLab Corporation*) software. All XRF spectra were normalized by  
197 values of the detector *Real time* to obtain values in [cts/s]. Finally, the calibration curve was  
198 fitted using a linear regression method for values obtained from  $\text{K}_2\text{Cr}_2\text{O}_7$ ,  $\text{CrCl}_3 \times 5\text{H}_2\text{O}$ ,  $\text{Cr}_2\text{O}_3$   
199 references. As mentioned before, to fit liposomal samples into a cryostat holder, we had to cut  
200 them. Thus, in the XRF experiment, we had only parts of the samples measured in the XAS  
201 experiment. To overcome this problem, we have calculated a correction factor for all samples,

202 based on the studied sample area. To do this, we took high-resolution photographs of all  
203 DMPC:DOPE + Cr pellets in high contrast and under the same conditions. Next, using GNU  
204 Image Manipulation Program (GIMP) 2.8.16 (*Spencer Kimball, Peter Mattis and the GIMP*  
205 *Development Team*) color selection tool (“Fuzzy Selection Tool”) set to 7 px threshold, we have  
206 selected all parts of the image with black color. A binary image was created and further opened  
207 in ImageJ 1.49v (*Wayne Rasband, National Institute of Health, USA*) software<sup>8</sup>. The pellet area  
208 was counted using the option Analyze -> Analyze Particles. Results for liposomal samples were  
209 compared with an undamaged reference Cr<sub>2</sub>O<sub>3</sub> pellet, and the correction factor for each sample  
210 was calculated. Obtained correction allowed us to calculate the total Cr content inside liposomal  
211 samples.

212

213

214

## 215 References

216

- 217 1 R. N. A. H. Lewis and R. N. Mcelhaney, *BBA - Biomembranes*, 2013, **1828**, 2347–2358.
- 218 2 R. Koynova and M. Caffrey, .
- 219 3 M. Caffrey and J. Hogan, *Chem Phys Lipids*, 1992, **61**, 1–109.
- 220 4 C. Demetzos, *J Liposome Res*, 2008, **18**, 159–173.
- 221 5 R. Girardot, G. Viguier, J. Pérez and M. Ounsy, in *Proceedings of the 8th canSAS Meeting*,  
222 Tokai, Japan, 2015.
- 223 6 P. V. Konarev, V. V. Volkov, A. V. Sokolova, M. H. J. Koch and D. I. Svergun, *urn:issn:0021-8898*,  
224 2003, **36**, 1277–1282.
- 225 7 J. Belagyi, M. Pas, P. Raspor, M. Pesti and T. P??li, *Biochim Biophys Acta Biomembr*, 1999,  
226 **1421**, 175–182.
- 227 8 C. A. Schneider, W. S. Rasband and K. W. Eliceiri, *Nature Methods*, 2012, **9**, 671–675.

228
